# Supplementary material
Source: PubMed Central journal article supplement (PMC6892372)
Supplement: 41591_2019_450_MOESM1_ESM.pdf [file 41591_2019_450_MOESM1_ESM.pdf]

In the format provided by the authors and unedited.

# The vaginal microbiome and preterm birth

Jennifer M. Fettweis<sup>1,2,3</sup>, Myrna G. Serrano<sup>1,3</sup>, J. Paul Brooks<sup>3,4</sup>, David J. Edwards<sup>3,5</sup>,  
Philippe H. Girerd<sup>2,3</sup>, Hardik I. Parikh<sup>1</sup>, Bernice Huang<sup>1</sup>, Tom J. Arodz<sup>3,6</sup>, Laahirie Edupuganti<sup>1,3</sup>,  
Abigail L. Glascock<sup>7</sup>, Jie Xu<sup>3,8,9</sup>, Nicole R. Jimenez<sup>1,3</sup>, Stephany C. Vivadelli<sup>1,3</sup>, Stephen S. Fong<sup>3,10</sup>,  
Nihar U. Sheth<sup>11</sup>, Sophonie Jean<sup>1</sup>, Vladimir Lee<sup>1,3</sup>, Yahya A. Bokhari<sup>6</sup>, Ana M. Lara<sup>1</sup>, Shreni D. Mistry<sup>1</sup>,  
Robert A. Duckworth III<sup>1</sup>, Steven P. Bradley<sup>1</sup>, Vishal N. Koparde<sup>11</sup>, X. Valentine Orenda<sup>1</sup>,  
Sarah H. Milton<sup>2</sup>, Sarah K. Rozycki<sup>12</sup>, Andrey V. Matveyev<sup>1</sup>, Michelle L. Wright<sup>13,14,15</sup>,  
Snehalata V. Huzurbazar<sup>16</sup>, Eugenie M. Jackson<sup>16</sup>, Ekaterina Smirnova<sup>17,18</sup>, Jonas Korfach<sup>19</sup>,  
Yu-Chih Tsai<sup>19</sup>, Molly R. Dickinson<sup>1</sup>, Jamie L. Brooks<sup>1</sup>, Jennifer I. Drake<sup>1</sup>, Donald O. Chaffin<sup>20</sup>,  
Amber L. Sexton<sup>20</sup>, Michael G. Gravett<sup>20,21</sup>, Craig E. Rubens<sup>20</sup>, N. Romesh Wijesooriya<sup>9</sup>,  
Karen D. Hendricks-Muñoz<sup>3,8,9</sup>, Kimberly K. Jefferson<sup>1,3</sup>, Jerome F. Strauss III<sup>2,3</sup> and Gregory A. Buck<sup>1,3,6\*</sup>

<sup>1</sup>Department of Microbiology and Immunology, School of Medicine, Virginia Commonwealth University, Richmond, VA, USA. <sup>2</sup>Department of Obstetrics and Gynecology, School of Medicine, Virginia Commonwealth University, Richmond, VA, USA. <sup>3</sup>Center for Microbiome Engineering and Data Analysis, Virginia Commonwealth University, Richmond, VA, USA. <sup>4</sup>Supply Chain Management and Analytics, School of Business, Virginia Commonwealth University, Richmond, VA, USA. <sup>5</sup>Department of Statistical Sciences and Operations Research, College of Humanities and Sciences, Virginia Commonwealth University, Richmond, VA, USA. <sup>6</sup>Department of Computer Science, College of Engineering, Virginia Commonwealth University, Richmond, VA, USA. <sup>7</sup>VCU Life Sciences, Virginia Commonwealth University, Richmond, VA, USA. <sup>8</sup>Division of Neonatal Medicine, School of Medicine, Virginia Commonwealth University, Richmond, VA, USA. <sup>9</sup>Department of Pediatrics, School of Medicine, Children's Hospital of Richmond at Virginia Commonwealth University, Richmond, VA, USA. <sup>10</sup>Department of Chemical and Life Science Engineering, College of Engineering, Virginia Commonwealth University, Richmond, VA, USA. <sup>11</sup>Center for the Study of Biological Complexity, VCU Life Sciences, Virginia Commonwealth University, Richmond, VA, USA. <sup>12</sup>School of Medicine, Virginia Commonwealth University, Richmond, VA, USA. <sup>13</sup>Nell Hodgson Woodruff School of Nursing, Emory University, Atlanta, GA, USA. <sup>14</sup>Department of Women's Health, Dell School of Medicine, University of Texas at Austin, Austin, TX, USA. <sup>15</sup>School of Nursing, University of Texas at Austin, Austin, TX, USA. <sup>16</sup>Department of Biostatistics, School of Public Health, West Virginia University, Morgantown, WV, USA. <sup>17</sup>Department of Mathematical Sciences, University of Montana, Missoula, MT, USA. <sup>18</sup>Department of Biostatistics, School of Medicine, Virginia Commonwealth University, Richmond, VA, USA. <sup>19</sup>Pacific Biosciences, Menlo Park, CA, USA. <sup>20</sup>Global Alliance to Prevent Prematurity and Stillbirth, Seattle, WA, USA. <sup>21</sup>Department of Obstetrics & Gynecology, University of Washington, Seattle, WA, USA. \*e-mail: [gregory.buck@vcuhealth.org](mailto:gregory.buck@vcuhealth.org)

**Supplementary Table 1: Characteristics of the study cohort**

|                                       | Preterm delivery<br>< 37 wks (N=45) | Term delivery<br>≥ 39 wks (N=90) |    |
|---------------------------------------|-------------------------------------|----------------------------------|----|
| Mean BMI (kg/m <sup>2</sup> ) †       | 28.9 (7.8)                          | 30.9 (8.2)                       |    |
| Pregnancy History:                    |                                     |                                  |    |
| First conception                      | 8/45 (17.8%)                        | 24/90 (26.7%)                    |    |
| Nulliparity                           | 20/45 (44.4%)                       | 30/90 (33.3%)                    |    |
| Previous preterm births               | 14/45 (31.1%)                       | 9/90 (10.0%)                     | ** |
| Previous abortions‡                   | 25/45 (55.5%)                       | 32/90 (35.6%)                    | *  |
| Infertility treatment                 | 1/45 (2.2%)                         | 3/89 (3.4%)                      |    |
| Chronic hypertension                  | 2/44 (4.4%)                         | 4/90 (4.4%)                      |    |
| Gestational hypertension              | 3/45 (6.7%)                         | 6/90 (6.7%)                      |    |
| Gestational Diabetes                  | 1/45 (2.2%)                         | 1/90 (1.1%)                      |    |
| Chorioamnionitis                      | 4/45 (8.9%)                         | 8/90 (8.9%)                      |    |
| Preeclampsia (not indication for PTB) | 5/45 (11.1%)                        | 4/90 (4.4%)                      |    |
| Group B strep                         | 20/37 (54%)                         | 24/83 (28.9%)                    | *  |
| Antibiotic usage§                     | 23/45 (51.1%)                       | 42/90 (46.7%)                    |    |
| Smoking (current)                     | 13/41 (31.7%)                       | 15/87 (17.2%)                    |    |
| Douching within past month            | 4/40 (10.0%)                        | 1/69 (1.4%)                      |    |
| ROM                                   | 44/44 (100%)                        | 79/88 (89.8%)                    |    |
| Short cervix                          | 6/45 (13.3%)                        | 0/90 (0%)                        | ** |
| Cerclage                              | 8/45 (17.8%)                        | 0/90 (0%)                        | ** |
| Progesterone                          | 7/40 (17.5%)                        | 4/86 (4.7%)                      | *  |
| First vaginal sample self-collected   | 31/45 (68.9%)                       | 60/90 (66.7%)                    |    |
| More than 5 lifetime sexual partners  | 14/43 (32.6%)                       | 41/87 (47.1%)                    |    |
| Mean apgar score                      |                                     |                                  |    |
| 1 min                                 | 7.9 (2.1)                           | 8.1 (1.9)                        |    |
| 5 min                                 | 8.1 (2.1)                           | 8.7 (1.1)                        |    |

\* Significant at  $p \leq 0.05$  (two-sided) by two-proportion Z-test

\*\* Significant at  $p \leq 0.01$  (two-sided) by two-proportion Z-test

† Mean with standard deviation; BMI at first visit during pregnancy at which data was collected

‡ Abortions and miscarriages prior to 20 weeks gestation

§ Six months prior to enrollment through birth

## Supplementary Table 2: Vagitype distribution and transitions

a) Summary of vagitypes (*i.e.*, community state types) observed in our preterm/term cohort

| Vagitype                          | Preterm<br>(N=45) | Term<br>(N=90) |
|-----------------------------------|-------------------|----------------|
| <i>Lactobacillus iners</i>        | 19 (42.22%)       | 34 (37.78%)    |
| <i>Lactobacillus crispatus</i>    | 2 (4.44%)         | 18 (20%)       |
| Lachnospiraceae BVAB1             | 7 (15.56%)        | 9 (10%)        |
| <i>Gardnerella vaginalis</i>      | 3 (6.67%)         | 8 (8.89%)      |
| <i>Atopobium vaginae</i>          | 2 (4.44%)         | 5 (5.56%)      |
| <i>Sneathia amnii</i>             | 0 (0%)            | 2 (2.22%)      |
| <i>Prevotella</i> cluster2        | 2 (4.44%)         | 0 (0%)         |
| <i>Streptococcus</i> cluster29    | 0 (0%)            | 2 (2.22%)      |
| "Ca. <i>Mycoplasma girerdii</i> " | 1 (2.22%)         | 0 (0%)         |
| <i>Streptococcus agalactiae</i>   | 1 (2.22%)         | 0 (0%)         |
| <i>Lactobacillus gasseri</i>      | 1 (2.22%)         | 3 (3.33%)      |
| <i>Lactobacillus delbrueckii</i>  | 0 (0%)            | 2 (2.22%)      |
| No Type                           | 7 (15.56%)        | 7 (7.78%)      |

\* Vagitypes of first collected sample from 45 women who delivered preterm and 90 who delivered full-term.

b) Vagitype (*i.e.*, community state type) transition probabilities

| Preterm delivery    |                     |       |                     |                 |       |
|---------------------|---------------------|-------|---------------------|-----------------|-------|
|                     | <i>G. vaginalis</i> | BVAB1 | <i>L. crispatus</i> | <i>L. iners</i> | Other |
| <i>G. vaginalis</i> | 0.03                | 0.23  | 0.04                | 0.43            | 0.28  |
| BVAB1               | 0.02                | 0.30  | 0.03                | 0.50            | 0.15  |
| <i>L. crispatus</i> | 0.00                | 0.01  | 0.88                | 0.03            | 0.08  |
| <i>L. iners</i>     | 0.02                | 0.10  | 0.06                | 0.60            | 0.22  |
| Other               | 0.03                | 0.14  | 0.06                | 0.35            | 0.42  |

| Term delivery       |                     |       |                     |                 |       |
|---------------------|---------------------|-------|---------------------|-----------------|-------|
|                     | <i>G. vaginalis</i> | BVAB1 | <i>L. crispatus</i> | <i>L. iners</i> | Other |
| <i>G. vaginalis</i> | 0.11                | 0.15  | 0.06                | 0.44            | 0.24  |
| BVAB1               | 0.05                | 0.34  | 0.03                | 0.46            | 0.12  |
| <i>L. crispatus</i> | 0.02                | 0.01  | 0.82                | 0.06            | 0.09  |
| <i>L. iners</i>     | 0.05                | 0.05  | 0.07                | 0.66            | 0.17  |
| Other               | 0.08                | 0.08  | 0.10                | 0.47            | 0.27  |

\* Ninety-day transition probabilities for vagitypes derived from a Markov chain analysis with pregnancy outcome (preterm and term) included as a covariate.

**Supplementary Table 3: Taxa abbreviations**

| Abbreviation | Taxon                                                              |
|--------------|--------------------------------------------------------------------|
| Achr         | <i>Aerococcus christensenii</i>                                    |
| Avag         | <i>Atopobium vaginae</i>                                           |
| BVAB2        | Clostridiales BVAB2                                                |
| CL22         | Clostridiales OTU22                                                |
| CO27         | Coriobacteriaceae OTU27                                            |
| C45          | <i>Corynebacterium</i> cluster 45                                  |
| Dcl51        | <i>Dialister</i> cluster 51                                        |
| Dmic         | <i>Dialister micraerophilus</i>                                    |
| ENcl31       | Enterobacteriaceae cluster 31                                      |
| F48          | <i>Fusobacterium</i> cluster 48                                    |
| Gvag         | <i>Gardnerella vaginalis</i>                                       |
| Gmorcl       | <i>Gemella morbillorum</i> cluster                                 |
| G86          | <i>Gemella</i> OTU86                                               |
| Hcl60        | <i>Haemophilus</i> cluster 60                                      |
| BVAB1        | Lachnospiraceae BVAB1                                              |
| Lcol         | <i>Lactobacillus coleohominis</i>                                  |
| Lcricl       | <i>Lactobacillus cripatus</i> cluster                              |
| Lgas         | <i>Lactobacillus gasseri</i> cluster                               |
| Line         | <i>Lactobacillus iners</i>                                         |
| Ljen         | <i>Lactobacillus jensenii</i>                                      |
| Lvag         | <i>Lactobacillus vaginalis</i>                                     |
| Mty1/ Ms070  | <i>Megasphaera</i> type1 OTU70                                     |
| Mty2         | <i>Megasphaera</i> type2 OTU71                                     |
| Mhom         | <i>Mycoplasma hominis</i>                                          |
| P142         | <i>Parvimonas</i> OTU142                                           |
| Pben         | <i>Porphyromonas bennonis</i>                                      |
| Pamn         | <i>Prevotella amnii</i>                                            |
| Pbiv         | <i>Prevotella bivia</i>                                            |
| Pcl2         | <i>Prevotella</i> cluster 2 (Note: contains <i>P. timonensis</i> ) |
| P50          | <i>Prevotella</i> cluster 50                                       |
| Pcor         | <i>Prevotella corporis</i>                                         |
| P49          | <i>Prevotella</i> OTU49                                            |
| Ptim         | <i>Prevotella timonensis</i>                                       |
| PR61         | Prevotellaceae OTU61                                               |
| Samn         | <i>Sneathia amnii</i>                                              |
| Ssan         | <i>Sneathia sanguinegens</i>                                       |
| S47          | <i>Staphylococcus</i> cluster 47                                   |
| Sang         | <i>Streptococcus anginosus</i>                                     |
| Strepcl29    | <i>Streptococcus</i> cluster 29                                    |
| Ssalcl       | <i>Streptococcus salivarius</i> cluster                            |
| TM7-H1       | TM7-H1                                                             |
| Ucl23        | <i>Ureaplasma</i> cluster 23                                       |

**Supplementary Table 4: Comparison of abundance levels of bacteria in the first sample of the preterm and full term cohorts**

| Taxon                                  | FDR-adjusted p-value PTB vs. TB<br>Mann-Whitney U test | Median abundance PTB cohort | Median abundance TB cohort | Abundance 75th-pctl PTB cohort | Abundance 75th-pctl TB cohort |
|----------------------------------------|--------------------------------------------------------|-----------------------------|----------------------------|--------------------------------|-------------------------------|
| <i>Lactobacillus iners</i>             |                                                        | 0.16148                     | 0.23891                    | 0.72016                        | 0.75417                       |
| <i>Lactobacillus crispatus</i> cluster | 0.0325                                                 | 0.00011                     | 0.00028                    | 0.00054                        | 0.00905                       |
| <i>Gardnerella vaginalis</i>           |                                                        | 0.08219                     | 0.00401                    | 0.15309                        | 0.08559                       |
| Lachnospiraceae BVAB1                  | 0.0278                                                 | 0.00061                     | 0.00006                    | 0.09589                        | 0.00064                       |
| <i>Atopobium vaginae</i>               |                                                        | 0.01277                     | 0.0002                     | 0.05359                        | 0.0163                        |
| <i>Prevotella</i> cluster2             | 0.0149                                                 | 0.01214                     | 0.00054                    | 0.05699                        | 0.00937                       |
| <i>Lactobacillus gasseri</i> cluster   |                                                        | 0                           | 0.00001                    | 0.00006                        | 0.0001                        |
| <i>Lactobacillus jensenii</i>          |                                                        | 0.00003                     | 0.00003                    | 0.00147                        | 0.00083                       |
| <i>Megasphaera</i> type1 OTU70         |                                                        | 0.01032                     | 0.00003                    | 0.03086                        | 0.01907                       |
| <i>Sneathia amnii</i>                  | 0.0023                                                 | 0.00071                     | 0.00001                    | 0.02149                        | 0.00031                       |
| <i>Dialister</i> cluster51             | 0.0049                                                 | 0.00307                     | 0.00004                    | 0.00813                        | 0.00141                       |
| <i>Prevotella amnii</i>                | 0.0006                                                 | 0.00018                     | 0                          | 0.00266                        | 0.00002                       |
| <i>Prevotella bivia</i>                |                                                        | 0.00004                     | 0.00016                    | 0.00031                        | 0.00088                       |
| <i>Ureaplasma</i> cluster23            |                                                        | 0.0002                      | 0.00025                    | 0.00212                        | 0.00326                       |
| <i>Aerococcus christensenii</i>        | 0.0394                                                 | 0.00083                     | 0.00002                    | 0.00487                        | 0.00247                       |
| Coriobacteriaceae OTU27                | 0.0242                                                 | 0.00198                     | 0                          | 0.00818                        | 0.00241                       |
| TM7-H1                                 |                                                        | 0                           | 0                          | 0.00006                        | 0                             |
| <i>Sneathia sanguinegens</i>           | 0.0188                                                 | 0.00026                     | 0                          | 0.00304                        | 0.00011                       |
| <i>Mycoplasma hominis</i>              |                                                        | 0.00003                     | 0                          | 0.00228                        | 0.00005                       |
| Clostridiales BVAB2                    | 0.007                                                  | 0.00021                     | 0                          | 0.00424                        | 0.0001                        |
| <i>Dialister microaerophilus</i>       | 0.0149                                                 | 0.00225                     | 0.0002                     | 0.00414                        | 0.0018                        |
| <i>Megasphaera</i> type2 OTU71         |                                                        | 0                           | 0                          | 0                              | 0                             |
| <i>Prevotella</i> cluster50            |                                                        | 0.00001                     | 0.00001                    | 0.00214                        | 0.00011                       |
| Prevotellaceae OTU61                   |                                                        | 0                           | 0                          | 0.00006                        | 0                             |
| <i>Fingoldia magna</i>                 |                                                        | 0.00007                     | 0.0001                     | 0.00044                        | 0.00055                       |
| <i>Parvimonas</i> OTU142               | 0.0081                                                 | 0.00062                     | 0                          | 0.00351                        | 0.00022                       |

\*Taxa with at least 5% of all subjects (n=135) having vaginal 16S rRNA abundance of 0.01 or higher, or at least 15% of subjects having abundance of 0.001 or higher. For each of these 26 abundant taxa, we provide median and 75-percentile of abundance levels in the PTB and TB cohorts, on the scale from 0 (not present) to 1 (100% of reads in the sample are from this taxa). We also provide the p-value (two-sided) for the Mann-Whitney U test for difference in abundance between the PTB and TB cohort, corrected using the Benjamini-Hochberg procedure with a False Discovery Rate of 5%; p-values are provided only for the taxa with statistically significant difference. The earliest sample available for each subject was used. Abundance values below 0.00001 were rounded down to 0.

**Supplementary Table 5: Comparison of abundance levels of bacteria in the samples prior to 24 weeks of gestation in the preterm and full term cohorts**

| Taxon                                  | FDR-adjusted p-value PTB vs. TB<br><br>Mann-Whitney U test | Median abundance PTB cohort | Median abundance TB cohort | Abundance 75th-pctl PTB cohort | Abundance 75th-pctl TB cohort |
|----------------------------------------|------------------------------------------------------------|-----------------------------|----------------------------|--------------------------------|-------------------------------|
| <i>Lactobacillus iners</i>             |                                                            | 0.161479875                 | 0.153030306                | 0.709926724                    | 0.574055731                   |
| <i>Lactobacillus crispatus</i> cluster |                                                            | 0                           | 0                          | 0                              | 0.517945364                   |
| <i>Gardnerella vaginalis</i>           |                                                            | 0.118326016                 | 0.003631449                | 0.182883576                    | 0.148198731                   |
| Lachnospiraceae BVAB1                  | 0.000751915                                                | 0.016490117                 | 0                          | 0.203617163                    | 0                             |
| <i>Atopobium vaginae</i>               |                                                            | 0.022259321                 | 0                          | 0.064351335                    | 0.052899227                   |
| <i>Prevotella</i> cluster2             | 0.015110353                                                | 0.013067584                 | 0                          | 0.057595188                    | 0.013028861                   |
| <i>Lactobacillus gasseri</i> cluster   |                                                            | 0                           | 0                          | 0                              | 0                             |
| <i>Lactobacillus jensenii</i>          |                                                            | 0                           | 0                          | 0                              | 0                             |
| <i>Megasphaera</i> type1 OTU70         | 0.039438636                                                | 0.016587732                 | 0                          | 0.033147332                    | 0.015058744                   |
| <i>Sneathia amnii</i>                  | 0.006076968                                                | 0.003664432                 | 0                          | 0.023375567                    | 0                             |
| <i>Dialister</i> cluster51             | 0.010102959                                                | 0.004019905                 | 0                          | 0.009680544                    | 0.001319003                   |
| <i>Prevotella amnii</i>                | 0.013544538                                                | 0                           | 0                          | 0.002351971                    | 0                             |
| <i>Prevotella bivia</i>                |                                                            | 0                           | 0                          | 0                              | 0                             |
| <i>Ureaplasma</i> cluster23            |                                                            | 0                           | 0                          | 0.002114076                    | 0.003536482                   |
| <i>Aerococcus christensenii</i>        |                                                            | 0                           | 0                          | 0.006053433                    | 0.002639649                   |
| Coriobacteriaceae OTU27                |                                                            | 0.002581544                 | 0                          | 0.011263814                    | 0.002373542                   |
| TM7-H1                                 | 0.010102959                                                | 0                           | 0                          | 0.005823944                    | 0                             |
| <i>Sneathia sanguinegens</i>           |                                                            | 0                           | 0                          | 0.003490496                    | 0                             |
| <i>Mycoplasma hominis</i>              |                                                            | 0                           | 0                          | 0.002387851                    | 0                             |
| Clostridiales BVAB2                    | 0.047623929                                                | 0                           | 0                          | 0.005646437                    | 0                             |
| <i>Dialister micraerophilus</i>        | 0.039438636                                                | 0.001793266                 | 0                          | 0.004399358                    | 0.001751052                   |
| <i>Megasphaera</i> type2 OTU71         |                                                            | 0                           | 0                          | 0                              | 0                             |
| Prevotellaceae OTU61                   |                                                            | 0                           | 0                          | 0.00082111                     | 0                             |
| <i>Fingoldia magna</i>                 |                                                            | 0                           | 0                          | 0                              | 0                             |
| <i>Parvimonas</i> OTU142               | 0.039438636                                                | 0                           | 0                          | 0.005366583                    | 0                             |

\*Taxa with at least 5% of subjects with samples collected within the first 24 weeks of pregnancy (n=90) having vaginal 16S rRNA abundance of 0.01 or higher, or at least 15% of subjects having abundance of 0.001 or higher. The earliest sample available for each subject was used. Abundance values below 0.001 were rounded down to 0. For each of these 25 abundant taxa, we provide median and 75-percentile of abundance levels in the PTB and TB cohorts, on the scale from 0 (not present) to 1 (100% of reads in the sample are from this taxa). We also provide the p-value (two-sided) for the Mann-Whitney U test for difference in abundance between the PTB and TB cohort, corrected using the Benjamini-Hochberg procedure with a False Discovery Rate of 5%; p-values are provided only for the taxa with statistically significant difference.

**Supplementary Table 6: Genome characteristics of BVAB1 and TM7-H1**

| Organism                                            | BVAB1 str. S1   | TM7-H1 str. E1                        |
|-----------------------------------------------------|-----------------|---------------------------------------|
| Genome Size (Mb)                                    | 1.45            | 0.72                                  |
| Phylum                                              | Firmicutes      | <i>Candidatus</i><br>Saccharibacteria |
| Family                                              | Lachnospiraceae | Candidate division TM7*               |
| Genus                                               | ND              | ND                                    |
| N50 (Bp)                                            | 41,915          | 424,142                               |
| Contigs                                             | 22              | 3                                     |
| DNA GC Content (%)                                  | 31.2            | 47.6                                  |
| DNA coding region (%)‡                              | 86.8            | 91.2                                  |
| Total genes‡                                        | 1300            | 732                                   |
| Average gene size (bp)‡                             | 966             | 900                                   |
| Coding sequences‡                                   | 1259            | 687                                   |
| rRNA genes                                          | n/a             | 3                                     |
| tRNA genes‡                                         | 40              | 45                                    |
| tmRNA genes‡                                        | 1               | 0                                     |
| Episomal elements†                                  | 0               | 6                                     |
| Repeat regions‡                                     | 1               | 0                                     |
| Signal peptides‡                                    | 40              | 35                                    |
| Hypothetical proteins‡                              | 387             | 362                                   |
| Virulence and defense determinants (hypothetical) † | 120             | 17                                    |

\* Unranked; ND, not defined.

† Identified using RAST (see Methods)

‡ Identified using Prokka (see Methods)

§ Identified using RNAmmer (see Methods)

**Supplementary Table 7: Amino acid metabolism in metabolic models of *L. crispatus*, BVAB1 and TM7-H1**

| AMINO ACID PATHWAY                                  | KEGG Reference | <i>L. crispatus</i> |            | BVAB1 |            | TM7-H1 |            |
|-----------------------------------------------------|----------------|---------------------|------------|-------|------------|--------|------------|
|                                                     |                | Count               | % Complete | Count | % Complete | Count  | % Complete |
| Alanine, Aspartate and Glutamate Metabolism         | 50             | 10                  | 20         | 9     | 18         | 0      | 0          |
| Glycine, serine and threonine metabolism            | 68             | 8                   | 12         | 4     | 6          | 1      | 1          |
| Cysteine and methionine metabolism                  | 76             | 10                  | 13         | 4     | 5          | 1      | 1          |
| Valine, leucine and isoleucine degradation          | 36             | 1                   | 3          | 0     | 0          | 0      | 0          |
| Valine, leucine and isoleucine biosynthesis         | 14             | 0                   | 0          | 0     | 0          | 0      | 0          |
| Lysine biosynthesis                                 | 28             | 9                   | 32         | 2     | 7          | 2      | 7          |
| Lysine degradation                                  | 53             | 0                   | 0          | 1     | 2          | 0      | 0          |
| Arginine biosynthesis                               | 28             | 3                   | 11         | 7     | 25         | 0      | 0          |
| Arginine and proline metabolism                     | 86             | 0                   | 0          | 3     | 3          | 1      | 1          |
| Histidine metabolism                                | 38             | 0                   | 0          | 0     | 0          | 0      | 0          |
| Tyrosine metabolism                                 | 61             | 1                   | 2          | 1     | 2          | 0      | 0          |
| Phenylalanine metabolism                            | 66             | 1                   | 2          | 2     | 3          | 1      | 2          |
| Tryptophan metabolism                               | 58             | 0                   | 0          | 1     | 2          | 1      | 2          |
| Phenylalanine, tyrosine and tryptophan biosynthesis | 39             | 1                   | 3          | 7     | 18         | 0      | 0          |



**Supplementary Table 8: Carbohydrate metabolism in metabolic models of *L. crispatus*, BVAB1 and TM7-H1**

| CARBOHYDRATE PATHWAY                        | KEGG Reference | <i>L. crispatus</i> |            | BVAB1 |            | TM7-H1 |            |
|---------------------------------------------|----------------|---------------------|------------|-------|------------|--------|------------|
|                                             |                | Count               | % Complete | Count | % Complete | Count  | % Complete |
| Glycolysis / Gluconeogenesis                | 47             | 11                  | 23         | 12    | 26         | 9      | 19         |
| Citrate cycle (TCA cycle)                   | 25             | 2                   | 8          | 0     | 0          | 0      | 0          |
| Pentose phosphate pathway                   | 55             | 8                   | 15         | 10    | 18         | 6      | 11         |
| Pentose and glucuronate interconversions    | 67             | 3                   | 4          | 2     | 3          | 2      | 3          |
| Fructose and mannose metabolism             | 75             | 6                   | 8          | 7     | 9          | 5      | 7          |
| Galactose metabolism                        | 48             | 9                   | 19         | 6     | 13         | 3      | 6          |
| Ascorbate and aldarate metabolism           | 46             | 2                   | 4          | 1     | 2          | 0      | 0          |
| Starch and sucrose metabolism               | 77             | 7                   | 9          | 5     | 6          | 4      | 5          |
| Amino sugar and nucleotide sugar metabolism | 119            | 13                  | 11         | 12    | 10         | 6      | 5          |
| Pyruvate metabolism                         | 67             | 8                   | 12         | 7     | 10         | 4      | 6          |
| Glyoxylate and dicarboxylate metabolism     | 73             | 4                   | 5          | 3     | 4          | 0      | 0          |
| Propanoate metabolism                       | 55             | 2                   | 4          | 5     | 9          | 2      | 4          |
| Butanoate metabolism                        | 55             | 1                   | 2          | 3     | 5          | 0      | 0          |
| C5-Branched dibasic acid metabolism         | 22             | 0                   | 0          | 0     | 0          | 0      | 0          |
| Inositol phosphate metabolism               | 48             | 1                   | 2          | 1     | 2          | 1      | 2          |

**Supplementary Table 9: Taxonomic contribution of genes that significantly differ between preterm and term cohorts in metatranscriptomics data**

|                                                  | ↑ Preterm | ↑ Term |
|--------------------------------------------------|-----------|--------|
| <i>Prevotella cluster2</i>                       | 3820      | 1      |
| <i>Anaerococcus tetradus</i>                     | 1317      | 0      |
| <i>Peptoniphilus harei</i>                       | 1171      | 0      |
| <i>Megasphaera OTU70 type1</i>                   | 988       | 1      |
| <i>Prevotella cluster50</i>                      | 980       | 0      |
| <i>Prevotella disiens</i>                        | 975       | 0      |
| <i>Streptococcus anginosus</i>                   | 954       | 0      |
| <i>Sneathia amnii</i>                            | 909       | 0      |
| <i>Lachnospiraceae BVAB1</i>                     | 711       | 0      |
| <i>Dialister cluster51</i>                       | 690       | 0      |
| <i>Sneathia sanguinogens</i>                     | 569       | 0      |
| <i>Prevotella amnii</i>                          | 485       | 1      |
| <i>Prevotella bivia</i>                          | 406       | 0      |
| <i>Peptoniphilus duerdenii</i>                   | 309       | 1      |
| <i>Coriobacteriaceae OTU27</i>                   | 299       | 0      |
| <i>Gardnerella vaginalis</i>                     | 211       | 94     |
| <i>Dialister micraerophilus</i>                  | 191       | 0      |
| <i>Anaerococcus OTU147</i>                       | 180       | 0      |
| <i>Fingoldia magna</i>                           | 143       | 3      |
| <i>Mycoplasma hominis</i>                        | 132       | 0      |
| <i>Atopobium vaginae</i>                         | 122       | 4      |
| <i>Gemella OTU86</i>                             | 120       | 0      |
| <i>Prevotella corporis</i>                       | 81        | 11     |
| <i>Corynebacterium cluster45</i>                 | 78        | 20     |
| <i>Clostridiales OTU22</i>                       | 73        | 0      |
| <i>Campylobacter ureolyticus</i>                 | 35        | 0      |
| <i>Corynebacterium coyleae</i>                   | 35        | 1      |
| <i>Aerococcus christensenii</i>                  | 32        | 1      |
| <i>Lactobacillus coleohominis</i>                | 32        | 103    |
| <i>Streptococcus agalactiae</i>                  | 21        | 0      |
| <i>Corynebacterium cluster58</i>                 | 16        | 5      |
| <i>Gemella morbillorum sanguinis haemolysans</i> | 15        | 0      |
| <i>Lactobacillus iners</i>                       | 15        | 2      |
| <i>Enterobacteriaceae cluster31</i>              | 10        | 3      |
| <i>Fenollaria timonensis</i>                     | 10        | 0      |
| <i>Fusobacterium cluster48</i>                   | 10        | 0      |
| <i>TM7 OTU-H1</i>                                | 10        | 0      |
| <i>Porphyromonas bennonis</i>                    | 9         | 0      |
| <i>Corynebacterium aurimucosum nigricans</i>     | 8         | 16     |
| <i>Megasphaera OTU71 type2</i>                   | 8         | 24     |
| <i>Peptoniphilus indolicus</i>                   | 7         | 0      |
| <i>Streptococcus cluster29</i>                   | 5         | 0      |
| <i>Staphylococcus cluster47</i>                  | 3         | 59     |
| <i>Actinomycetales OTU158</i>                    | 2         | 0      |
| <i>Lactobacillus gasseri cluster</i>             | 2         | 65     |
| <i>Lactobacillus jensenii</i>                    | 2         | 27     |
| <i>Bifidobacterium breve cluster</i>             | 1         | 24     |
| <i>Lactobacillus crispatus cluster</i>           | 1         | 2327   |
| <i>Lactobacillus delbrueckii</i>                 | 0         | 14     |
| <i>Lactobacillus vaginalis</i>                   | 0         | 887    |
| <i>Ureaplasma cluster23</i>                      | 0         | 86     |

\*Number of genes in taxa that significantly differ at  $\text{padj} < 0.05$  with a two-sided Wald test as implemented in DESeq2 and a Benjamini and Hochberg FDR correction.

**Supplementary Table 10: Taxonomic contribution of genes that significantly differ between preterm and term cohorts in metagenomics data**

|                                                  | ↑ Preterm | ↑ Term |
|--------------------------------------------------|-----------|--------|
| <i>Prevotella cluster2</i>                       | 292       | 0      |
| <i>Mycoplasma hominis</i>                        | 55        | 0      |
| <i>Prevotella cluster50</i>                      | 29        | 0      |
| <i>Prevotella amnii</i>                          | 16        | 0      |
| <i>Sneathia sanguinegens</i>                     | 16        | 0      |
| <i>Prevotella corporis</i>                       | 12        | 0      |
| <i>Anaerococcus tetradius</i>                    | 11        | 0      |
| <i>Anaerococcus OTU147</i>                       | 10        | 0      |
| <i>Lachnospiraceae BVAB1</i>                     | 9         | 0      |
| <i>Prevotella bivia</i>                          | 9         | 0      |
| <i>Prevotella disiens</i>                        | 8         | 0      |
| <i>Sneathia amnii</i>                            | 6         | 0      |
| <i>Fingoldia magna</i>                           | 4         | 0      |
| <i>Peptoniphilus duerdenii</i>                   | 3         | 0      |
| <i>Aerococcus christensenii</i>                  | 2         | 0      |
| <i>Gemella morbillorum sanguinis haemolysans</i> | 2         | 0      |
| <i>Clostridiales OTU22</i>                       | 1         | 0      |
| <i>Coriobacteriaceae OTU27</i>                   | 1         | 0      |
| <i>Gardnerella vaginalis</i>                     | 1         | 605    |
| <i>Gemella OTU86</i>                             | 1         | 0      |
| <i>Lactobacillus iners</i>                       | 1         | 1      |
| <i>Megasphaera OTU71 type2</i>                   | 1         | 0      |
| <i>Peptoniphilus indolicus</i>                   | 1         | 0      |
| <i>Streptococcus anginosus</i>                   | 1         | 0      |
| <i>Streptococcus cluster29</i>                   | 1         | 0      |
| <i>Atopobium vaginae</i>                         | 0         | 1      |
| <i>Lactobacillus crispatus cluster</i>           | 0         | 560    |

\*Number of genes in taxa that significantly differ at  $p_{adj} < 0.05$  with a two-sided Wald test as implemented in DESeq2 and a Benjamini and Hochberg FDR correction.

**Supplementary Table 11: Taxonomic contribution of genes predicted to be involved in bacterial secretion that significantly differ between preterm and term cohorts in metatranscriptomics data**

|                                        | Secreted ↑ Preterm | Secreted ↑ Term |
|----------------------------------------|--------------------|-----------------|
| <i>Prevotella cluster2</i>             | 24                 | 0               |
| <i>Sneathia amnii</i>                  | 15                 | 0               |
| <i>Lachnospiraceae BVAB1</i>           | 10                 | 0               |
| <i>Megasphaera OTU70 type1</i>         | 10                 | 0               |
| <i>Sneathia sanguinegens</i>           | 10                 | 0               |
| <i>Prevotella cluster50</i>            | 7                  | 0               |
| <i>Prevotella disiens</i>              | 6                  | 0               |
| <i>Dialister cluster51</i>             | 5                  | 0               |
| <i>Dialister microaerophilus</i>       | 3                  | 0               |
| <i>Peptoniphilus harei</i>             | 1                  | 0               |
| <i>Lactobacillus crispatus cluster</i> | 0                  | 2               |

\*Number of genes predicted to be involved in bacterial secretion in taxa that significantly differ at  $p_{adj} < 0.05$  with a two-sided Wald test as implemented in DESeq2 and a Benjamini and Hochberg FDR correction.

**Supplementary Table 12: Taxonomic contribution of genes predicted to be involved in bacterial secretion that significantly differ between preterm and term cohorts in metagenomics data**

|                              | Secreted ↑ Preterm | Secreted ↑ Term |
|------------------------------|--------------------|-----------------|
| <i>Prevotella cluster2</i>   | 8                  | 0               |
| <i>Sneathia sanguinegens</i> | 3                  | 0               |
| <i>Prevotella amnii</i>      | 2                  | 0               |
| <i>Sneathia amnii</i>        | 2                  | 0               |

\*Number of genes predicted to be involved in bacterial secretion in taxa that significantly differ at  $p_{adj} < 0.05$  with a two-sided Wald test as implemented in DESeq2 and a Benjamini and Hochberg FDR correction.

**Supplementary Table 13: Technical differences in protocols across studies of preterm birth and the vaginal microbiome**

|                                     | Fettweis <i>et al.</i> *                                                                                                              | Stout <i>et al.</i>                                                                 | Romero <i>et al.</i>                                                                                                                                                                                                                                                                                | Callahan <i>et al.</i> †                                                                     |
|-------------------------------------|---------------------------------------------------------------------------------------------------------------------------------------|-------------------------------------------------------------------------------------|-----------------------------------------------------------------------------------------------------------------------------------------------------------------------------------------------------------------------------------------------------------------------------------------------------|----------------------------------------------------------------------------------------------|
| BioProject                          | PRJNA430482                                                                                                                           | PRJNA294119                                                                         | PRJNA242473                                                                                                                                                                                                                                                                                         | PRJNA430482                                                                                  |
| Collection Swab                     | BD BBL™ CultureSwab™ EZ swabs (double tipped)                                                                                         | Dual-tipped rayon swab (Starplex Scientific, Ontario, Canada)                       | Dacron swab (medical packaging swab – PAK™ Carmarillo, CA, USA)                                                                                                                                                                                                                                     | Catch-All Sample Collection Swabs (Epicentre Biotechnologies)                                |
| Hypervariable region(s) of 16S rRNA | V1-V3‡                                                                                                                                | V1-V3‡; V3-V5§                                                                      | V1-V3‡                                                                                                                                                                                                                                                                                              | V4                                                                                           |
| Primers                             | <p>4x - FP1 -<br/>AGAGTTYGATYMTG<br/>GCTYAG</p> <p>1x - FP2 -<br/>AGARTTTGATCYTGG<br/>TTCAG</p> <p>R -<br/>ATTACCGCGGCTGC<br/>TGG</p> | <p>27F -<br/>AGAGTTTGATCCTGG<br/>CTCAG</p> <p>534R -<br/>ATTACCGCGGCTGC<br/>TGG</p> | <p>27F -<br/>AGAGTTTGATCCTG<br/>GCTCAG</p> <p>4x - 27f-YM -<br/>AGAGTTTGATYMTG<br/>GCTCAG</p> <p>1x - 27f-Bif -<br/>AGGGTTCGATTCTG<br/>GCTCAG</p> <p>1x - 27f-Bor -<br/>AGAGTTTGATCCTG<br/>GCTTAG</p> <p>1x - 27f-Chl -<br/>AGAATTTGATCTTG<br/>GTTCAG</p> <p>534R -<br/>TTACCGCGGCTGCT<br/>GGCA</p> | <p>515F -<br/>AATTGTGTGYCAGCMGC<br/>CGCGGTAA</p> <p>806R -<br/>GGACTACNVGGGTWTCT<br/>AAT</p> |
| Sequencing Technology               | Illumina MiSeq                                                                                                                        | Roche 454                                                                           | Roche 454                                                                                                                                                                                                                                                                                           | Illumina HiSeq                                                                               |

\* Current study

‡ The V1-V3 primers differ across all three studies

§ V3-V5 not used for replication cohort

† Only UAB cohort used in replication cohort

**Supplementary Table 14: Comparison of preterm birth cases in studies of the vaginal microbiome and preterm birth**

|                                          | Fettweis <i>et al.</i> * | Stout <i>et al.</i> | Romero <i>et al.</i> | Callahan <i>et al.</i><br>(UAB cohort) | Callahan <i>et al.</i><br>(Stanford cohort) |
|------------------------------------------|--------------------------|---------------------|----------------------|----------------------------------------|---------------------------------------------|
| African ancestry                         | 35/45 (77.8%)            | 16/24 (66.7%)       | 17/18 (94.4%)        | 36/41 (87.8%)                          | 0/9 (0%)                                    |
| Mean BMI (kg/m <sup>2</sup> )            | 28.9                     | 30                  | 25.7                 | 30.0                                   | 28.1                                        |
| Nulliparity                              | 20/45 (44.4%)            | --                  | 7/18 (38.9%)         | 0/41 (0%)                              | 2/9 (22.2%)                                 |
| Previous Preterm                         | 14/45 (31.1%)            | 17/24 (29.1%)       | --                   | 41/41 (100%)                           | --                                          |
| Spontaneous Preterm Birth                | 45/45 (100%)             | 9/24 (37.5%)†       | 18/18 (100%)         | 37/41 (90%)                            | 4/9 (44.4%)                                 |
| PPROM                                    | 26/45 (57.8%)            | 3/24 (12.5%)        | --                   | 7/41 (17.1%)                           | 2/9 (22.2%)                                 |
| PTL                                      | 19/45 (42.2%)            | 6/24 (25%)          | --                   | 30/41 (73.2%)                          | 2/9 (22.2%)                                 |
| Preeclampsia<br>(Indication for preterm) | 0/45 (0%)‡               | 11/24 (45.8%)       | 0/18 (0%)            | 2/41 (0.05%)                           | 2/9 (22.2%)                                 |
| AHC§                                     | 4/45 (8.9%)              | --                  | 11/18 (61%)          | --                                     | --                                          |
| Short Cervix                             | 6/45 (13.3%)             | --                  | --                   | --                                     | --                                          |
| Cerclage                                 | 8/45 (17.8%)             | 0/24 (0%)           | --                   | --                                     | --                                          |
| Progesterone                             | 7/40 (17.5%)             | 0/24 (0%)           | --                   | 41/41 (100%)                           | --                                          |

\* Current study

† Six identified metadata provided by M. Stout; 5 had data that passed QC

‡ 5/45 (11.1%) PreE, but not indication for PTB

§ Acute Histologic Chorioamnionitis

|| Intramuscular 17 $\alpha$ -hydroxyprogesterone caproate therapy

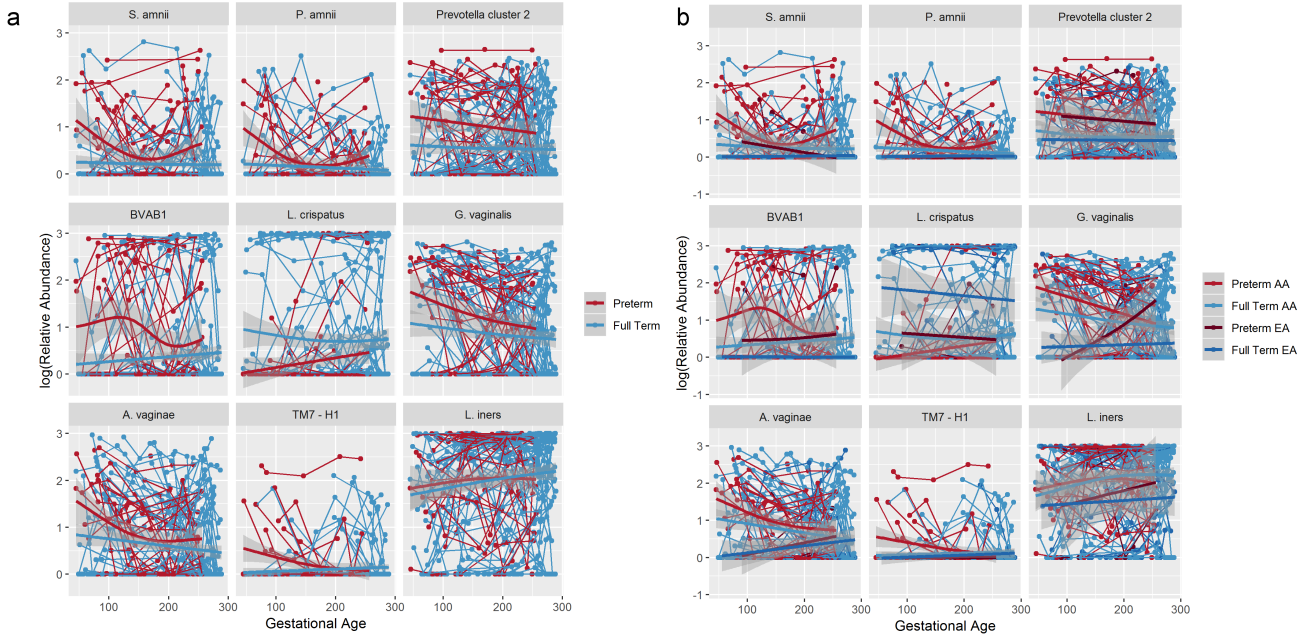

**Supplementary Figure 1: Longitudinal generalized additive mixed effect model (GAMM) of vaginal microbiome composition during pregnancy.** The model incorporates BMI, vaginal pH, pregnancy outcome (PTB, TB), a smoother for gestational age, and a random subject effect to longitudinally model log-transformed relative abundances of vaginally relevant taxa (see Methods). Each figure plots log-transformed abundances of taxa throughout pregnancy. Panel a exhibits plots comparing the preterm birth case (n=41) and full term birth cohorts (n=90). Panel b compares the results from preterm and full term women of African and European descent (*i.e.*, EA PTB n=7; AA PTB n=31; EA TB n=13; AA TB n=73). Confidence intervals (98%) are shown. Dots represent actual values.
